# Supplementary material for: Hydrothermal synthesis of long-chain hydrocarbons up to C24 with NaHCO3-assisted stabilizing cobalt
Source: PubMed Central journal article supplement — Proc Natl Acad Sci U S A. 2021 Dec 15;118(51):e2115059118. doi: 10.1073/pnas.2115059118 (PMC8713749; doi:10.1073/pnas.2115059118), 2021-12-15
Supplement: pnas.2115059118.sapp.pdf [file pnas.2115059118.sapp.pdf]

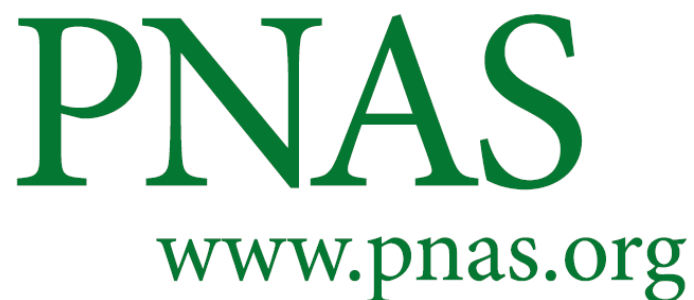

## **Supplementary Information for**

Hydrothermal synthesis of long-chain hydrocarbons up to C<sub>24</sub> with NaHCO<sub>3</sub>-assisted stabilizing cobalt

Daoping He, Xiaoguang Wang, Yang Yang, Runtian He, Heng Zhong, Ye Wang, Buxing Han, Fangming Jin

Fangming Jin; Heng Zhong; Buxing Han

Email: fmjin@sjtu.edu.cn; zhong.h@sjtu.edu.cn; hanbx@iccas.ac.cn

### **This PDF file includes:**

Figures S1 to S20  
Tables S1 to S2  
SI References

**Table S1. Comparison of natural alkaline hydrothermal environment and our hydrothermal system.** The low concentration of dissolved inorganic carbon in actual hydrothermal environment is due to its reduction to hydrocarbons and the precipitation of inorganic mineral deposits such as calcium carbonate. The choice of high concentration bicarbonate in the simulated environment is based on the following considerations. First, the high concentration bicarbonate can act as a strong buffer to maintain the pH thus to maintain the dominant species. Second, the high concentration bicarbonate can enhance the oxidation of Fe to generate H<sub>2</sub> thus to create a high-pressure reaction environment.

| Entry                                           | pH        | Carbon source                 | Concentration (M) | Temperature (°C)               | Pressure (MPa)                |
|-------------------------------------------------|-----------|-------------------------------|-------------------|--------------------------------|-------------------------------|
| Natural alkaline hydrothermal environment (1-7) | 9~11      | HCO <sub>3</sub> <sup>-</sup> | 0.012~0.03        | ≤ 400, a typical value is ~300 | ≤ 100, a typical value is ~35 |
| Our system                                      | 8.23~9.30 | HCO <sub>3</sub> <sup>-</sup> | 1.15              | 300                            | 30                            |

**Table S2. Effect of different transition metal/metal oxide additives on the formation of organic compounds from  $\text{HCO}_3^-$ .** The addition of Mo,  $\text{TiO}_2$ , ZnO and  $\text{Al}_2\text{O}_3$  failed to generate new products except for  $\text{HCOO}^-$ . The addition of Ni promoted the formation of methane. Experimental conditions: Fe, 80 mmol;  $\text{NaHCO}_3$ , 80 mmol; metal/metal oxide catalyst, 40 mmol; water filling, 50%; 300 °C, 3 h.

| Entry | Additives               | $\text{HCOO}^-$ (mmol) | Hydrocarbons (mmol) |                        |                        |                                                              |
|-------|-------------------------|------------------------|---------------------|------------------------|------------------------|--------------------------------------------------------------|
|       |                         |                        | $\text{CH}_4$       | $\text{C}_2\text{H}_6$ | $\text{C}_3\text{H}_8$ | $\text{C}_6\text{H}_{14}\text{--}\text{C}_{21}\text{H}_{44}$ |
| 1     | Co                      | 19.38                  | 7.81                | 0.94                   | 0.74                   | 0.71                                                         |
| 2     | Co*                     | 10.91                  | 1.78                | 0.14                   | 0.15                   | –                                                            |
| 3     | Ni                      | 6.58                   | 17.51               | 1.20                   | 0.25                   | –                                                            |
| 4     | Cu                      | 46.18                  | 0.62                | –                      | –                      | –                                                            |
| 5     | Mo                      | 36.04                  | –                   | –                      | –                      | –                                                            |
| 6     | $\text{TiO}_2$          | 15.68                  | –                   | –                      | –                      | –                                                            |
| 7     | ZnO                     | 27.86                  | –                   | –                      | –                      | –                                                            |
| 8     | $\text{Al}_2\text{O}_3$ | 18.26                  | –                   | –                      | –                      | –                                                            |
| 9     | –                       | 42.23                  | 0.47                | –                      | –                      | –                                                            |

\* Experimental conditions: Fe, 40 mmol;  $\text{NaHCO}_3$ , 40 mmol; Co, 40 mmol; water filling, 50%; 300 °C, 3 h.

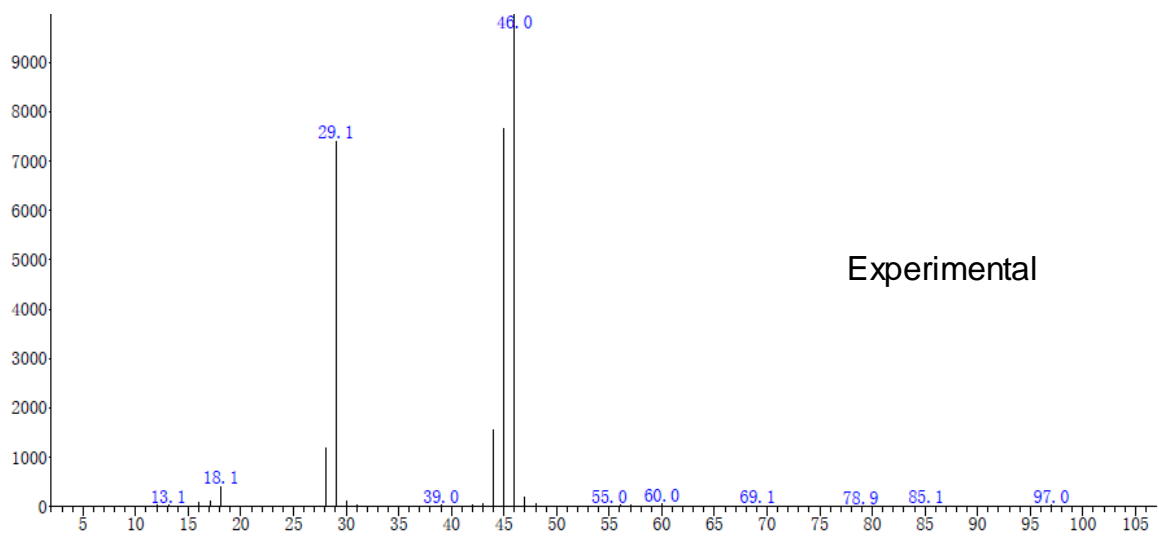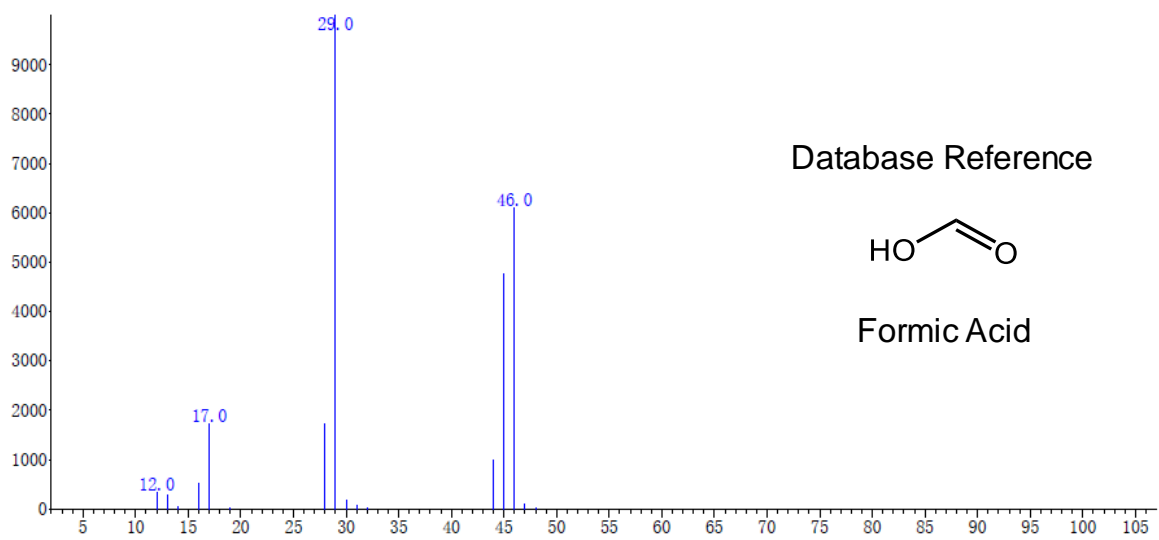

**Fig. S1. GC-MS analysis.** Mass spectrometry data for formic acid.

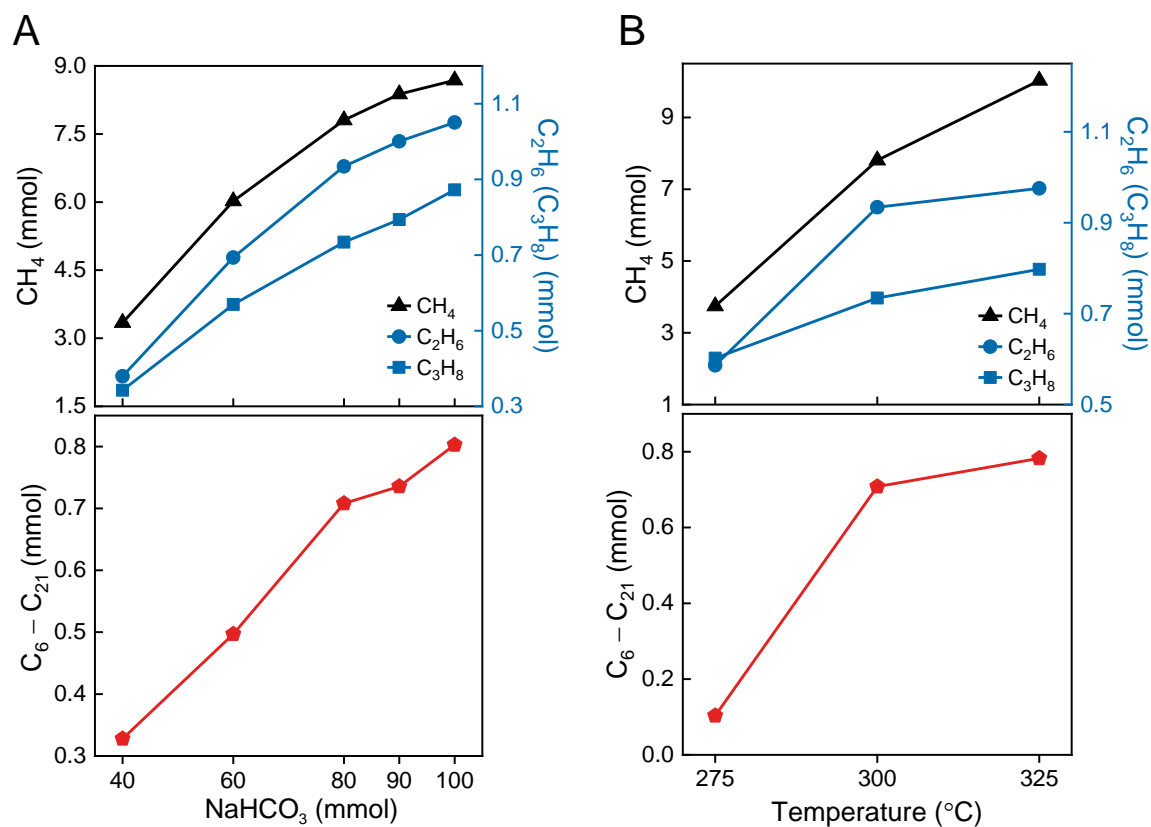

**Fig. S2. Kinetic experiments of concentration and temperature.** (A) Kinetic curves of hydrothermal production of  $C_1$ - $C_3$  (upper panel) and  $C_6$ - $C_{21}$  (bottom panel) alkanes with different amount of  $NaHCO_3$ . Experimental conditions: Fe, 80 mmol; Co, 40 mmol; water filling, 50%; 300  $^{\circ}C$ , 3 h. (B) Temperature-dependent production of  $C_1$ - $C_3$  (upper panel) and  $C_6$ - $C_{21}$  (bottom panel) from  $NaHCO_3$  reduction. Experimental conditions: Fe, 80 mmol;  $NaHCO_3$ , 80 mmol; Co, 40 mmol; water filling, 50%; 3 h.

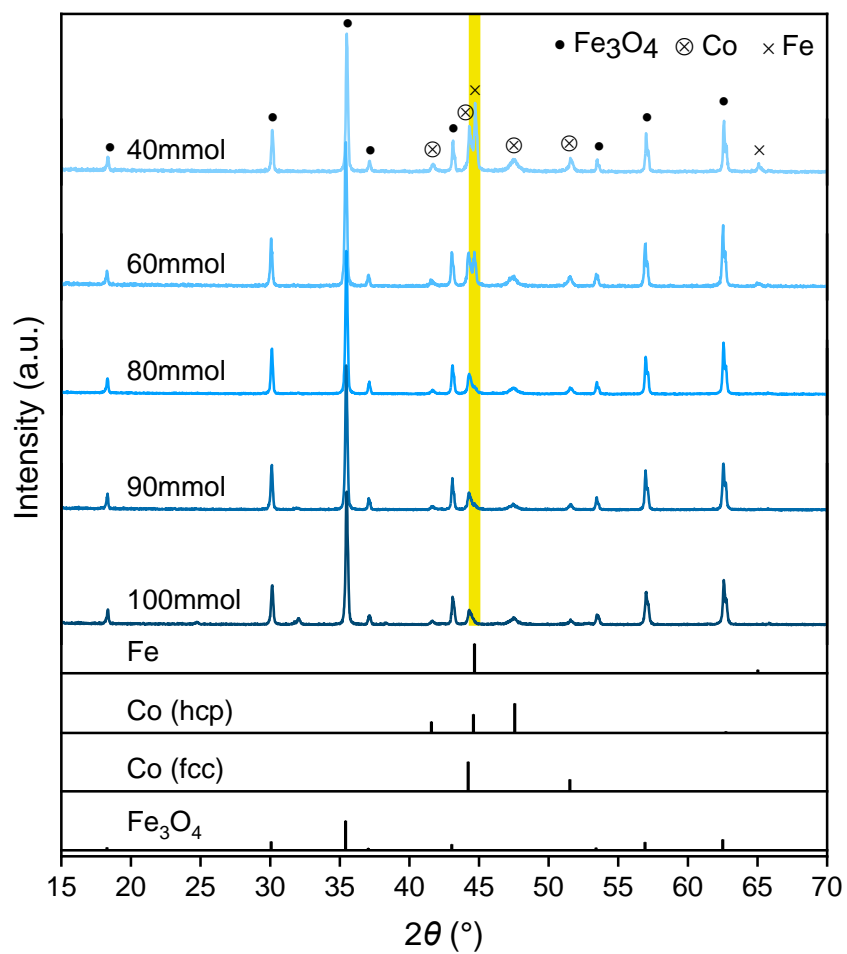

**Fig. S3. XRD analysis.** XRD patterns of the solid sample after hydrothermal reaction with different amount of  $\text{NaHCO}_3$ . Experimental conditions: Fe, 80 mmol; Co, 40 mmol; water filling, 50%; 300 °C, 3 h. The vertical black lines are the XRD peaks of standard Fe (JCPDS No. 89-7194), Co (JCPDS No. 01-1278 for hcp and No. 15-0806 for fcc), and  $\text{Fe}_3\text{O}_4$  (JCPDS No. 79-0418).

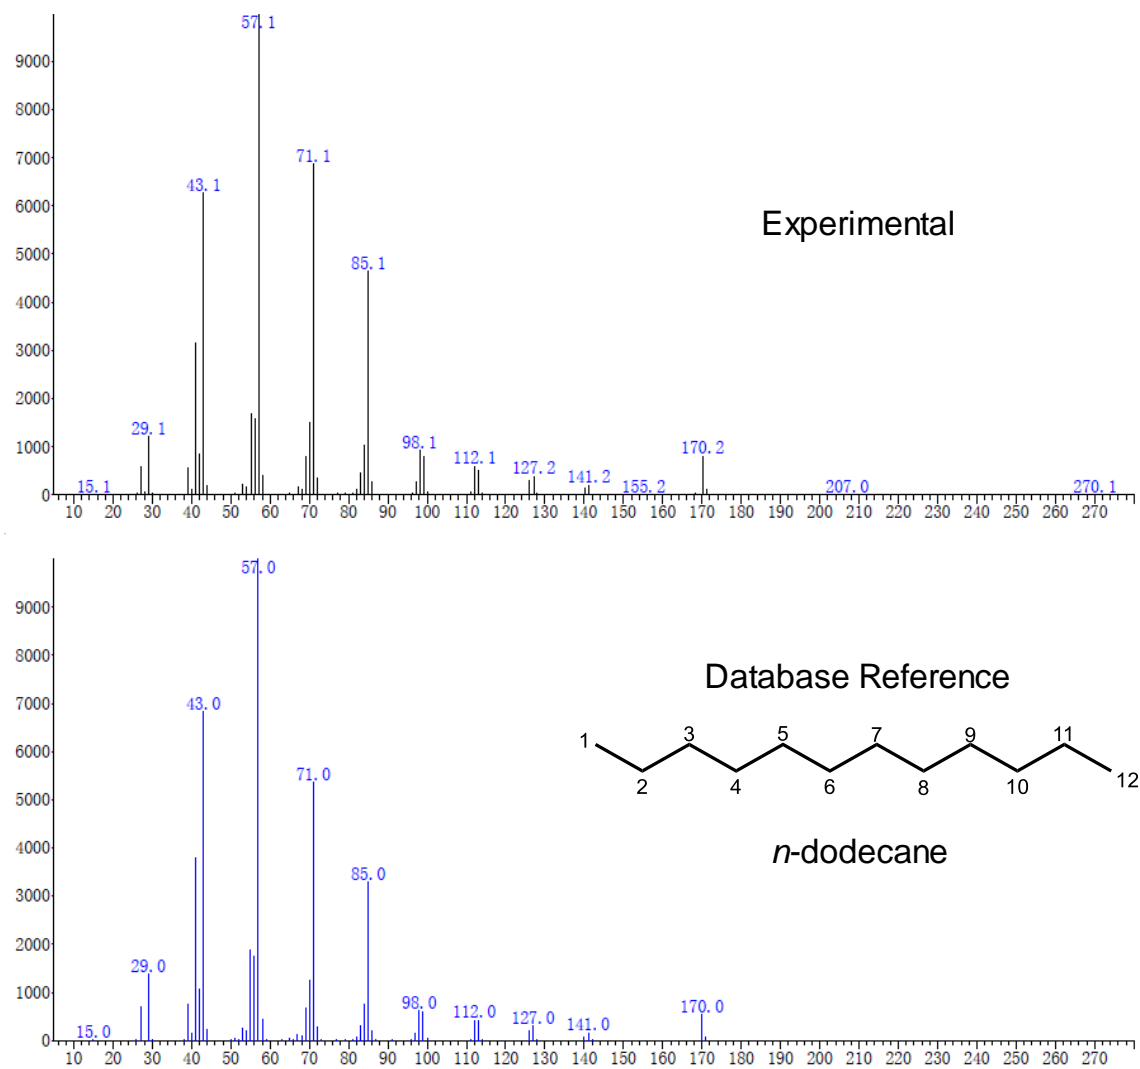

**Fig. S4. GC-MS analysis.** Mass spectrometry data for *n*-dodecane.

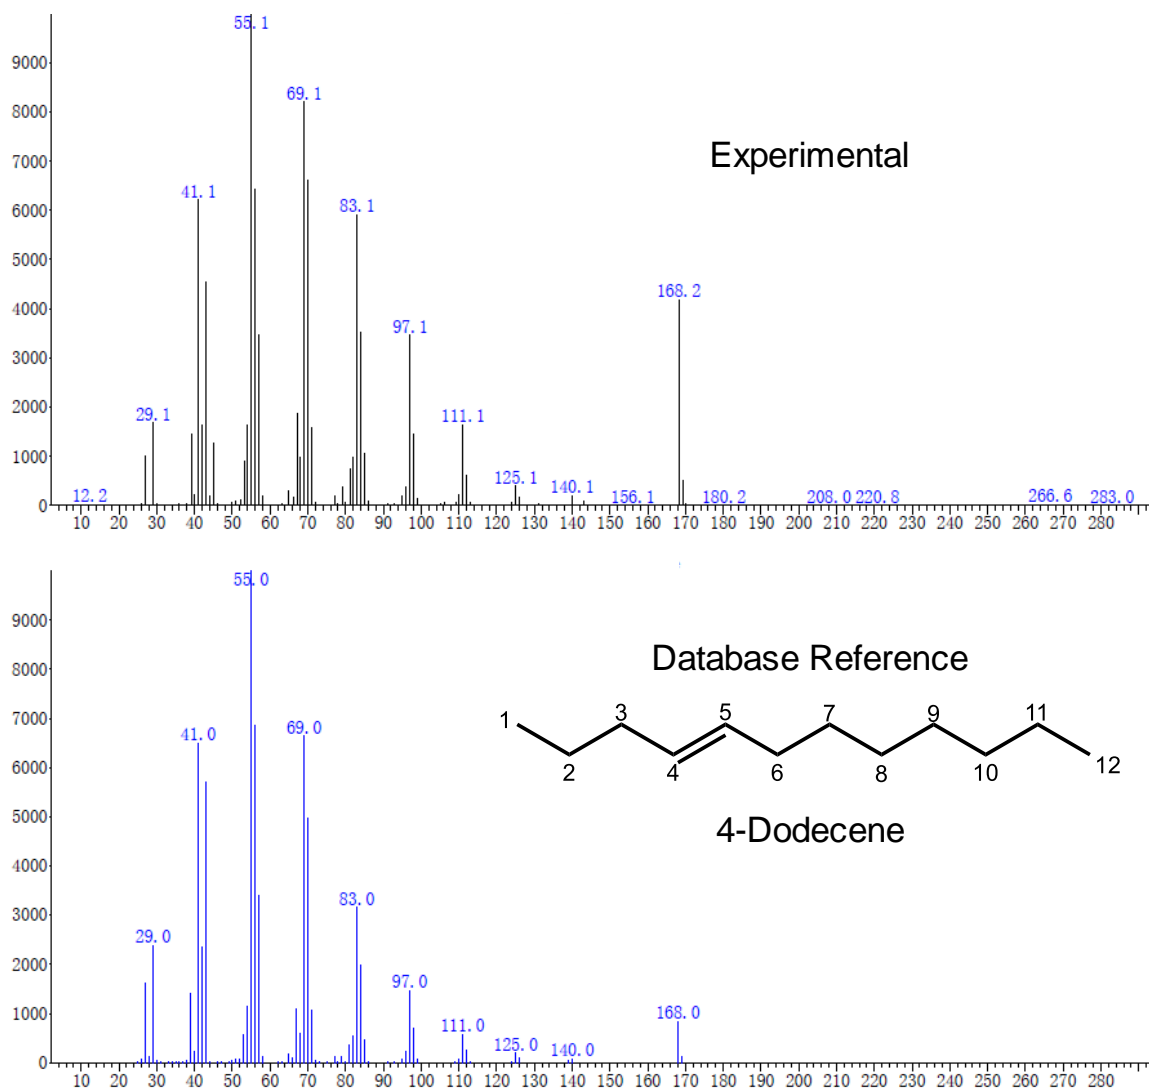

**Fig. S5. GC-MS analysis.** Mass spectrometry data for 4-Dodecene.



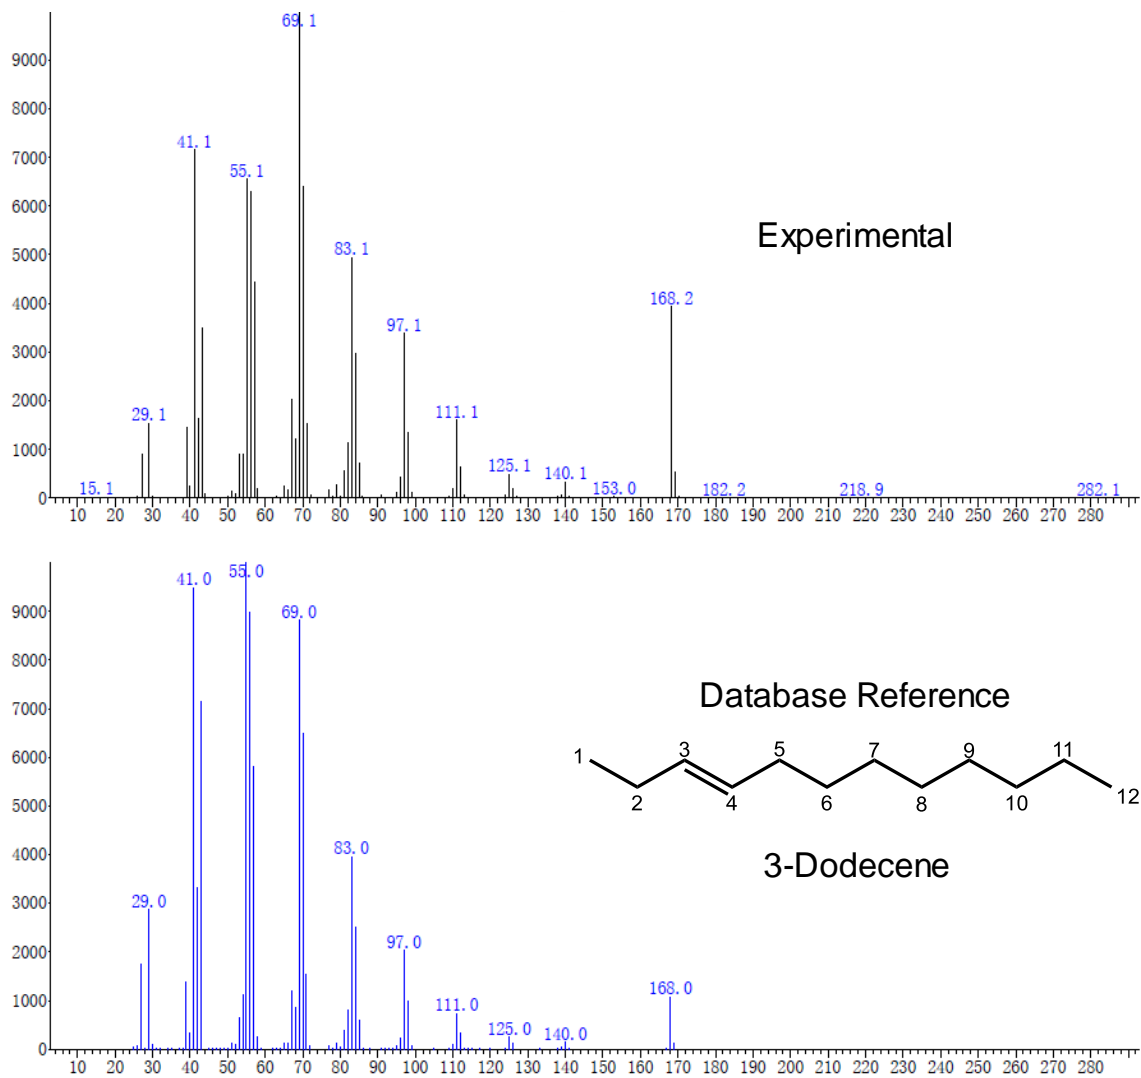

Fig. S6. GC-MS analysis. Mass spectrometry data for 3-Dodecene.

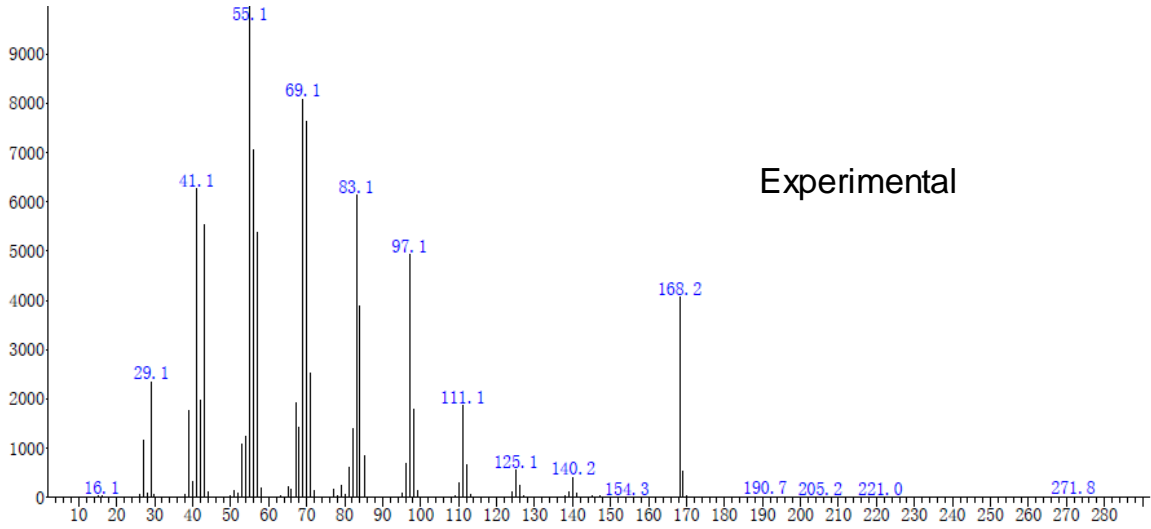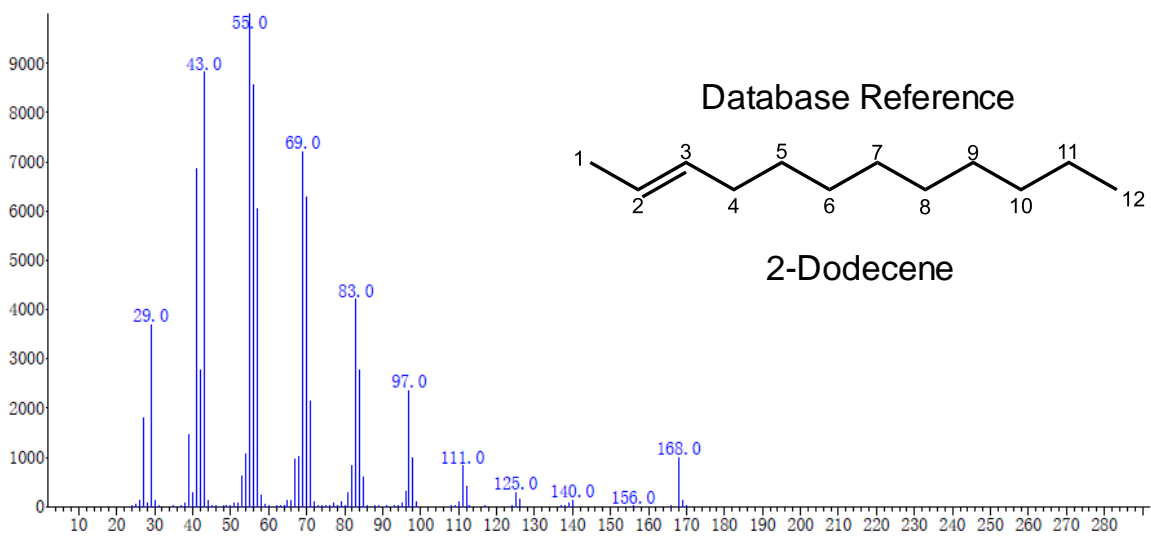

**Fig. S7. GC-MS analysis.** Mass spectrometry data for 2-Dodecene.

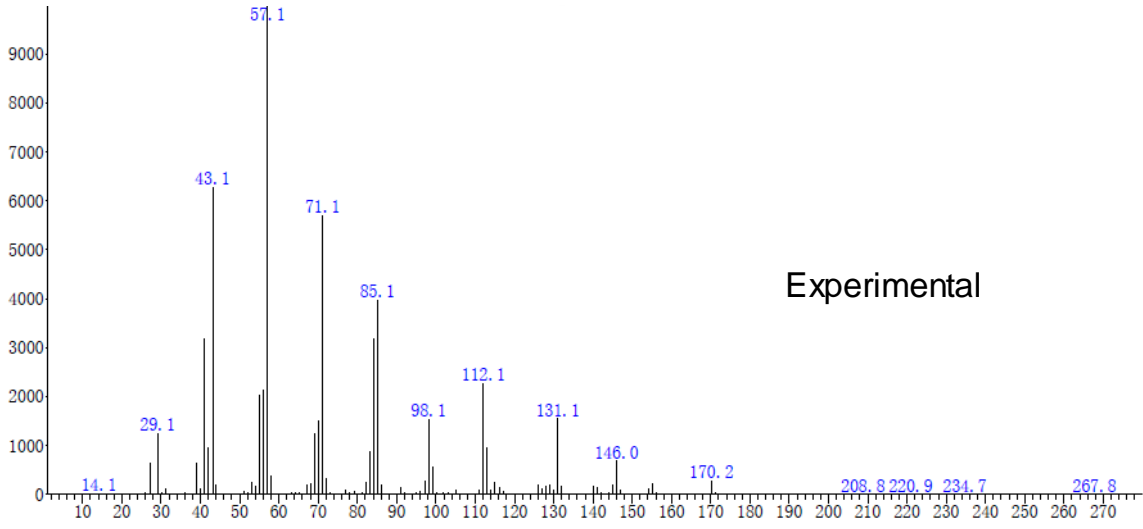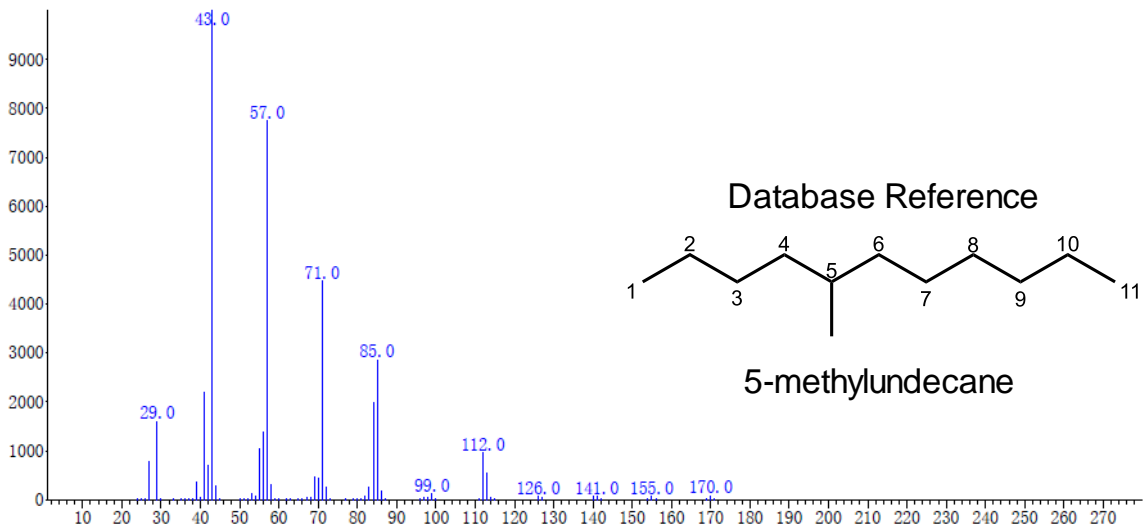

**Fig. S8. GC-MS analysis.** Mass spectrometry data for 5-methylundecane.

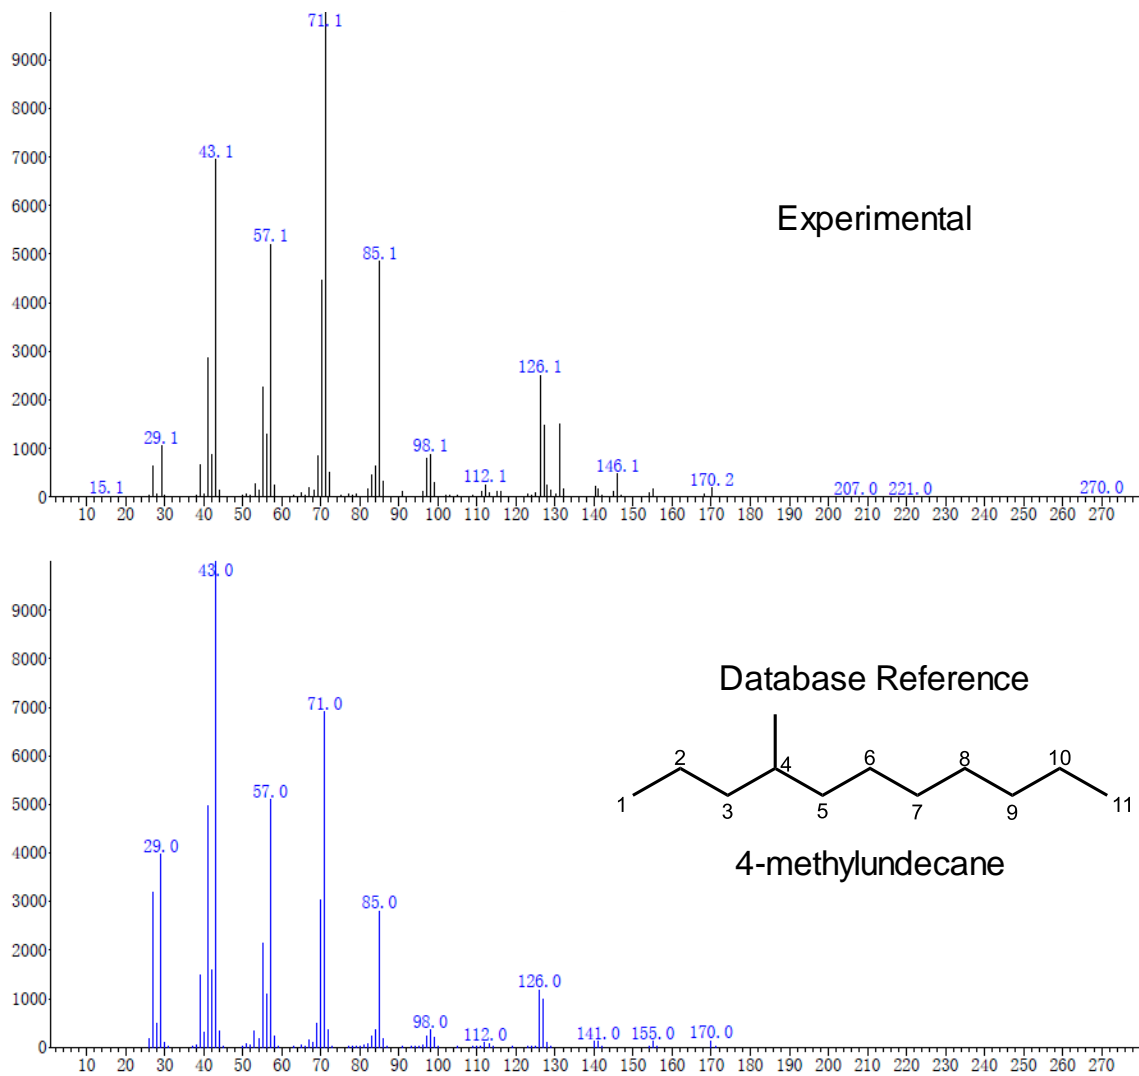

**Fig. S9. GC-MS analysis.** Mass spectrometry data for 4-methylundecane.

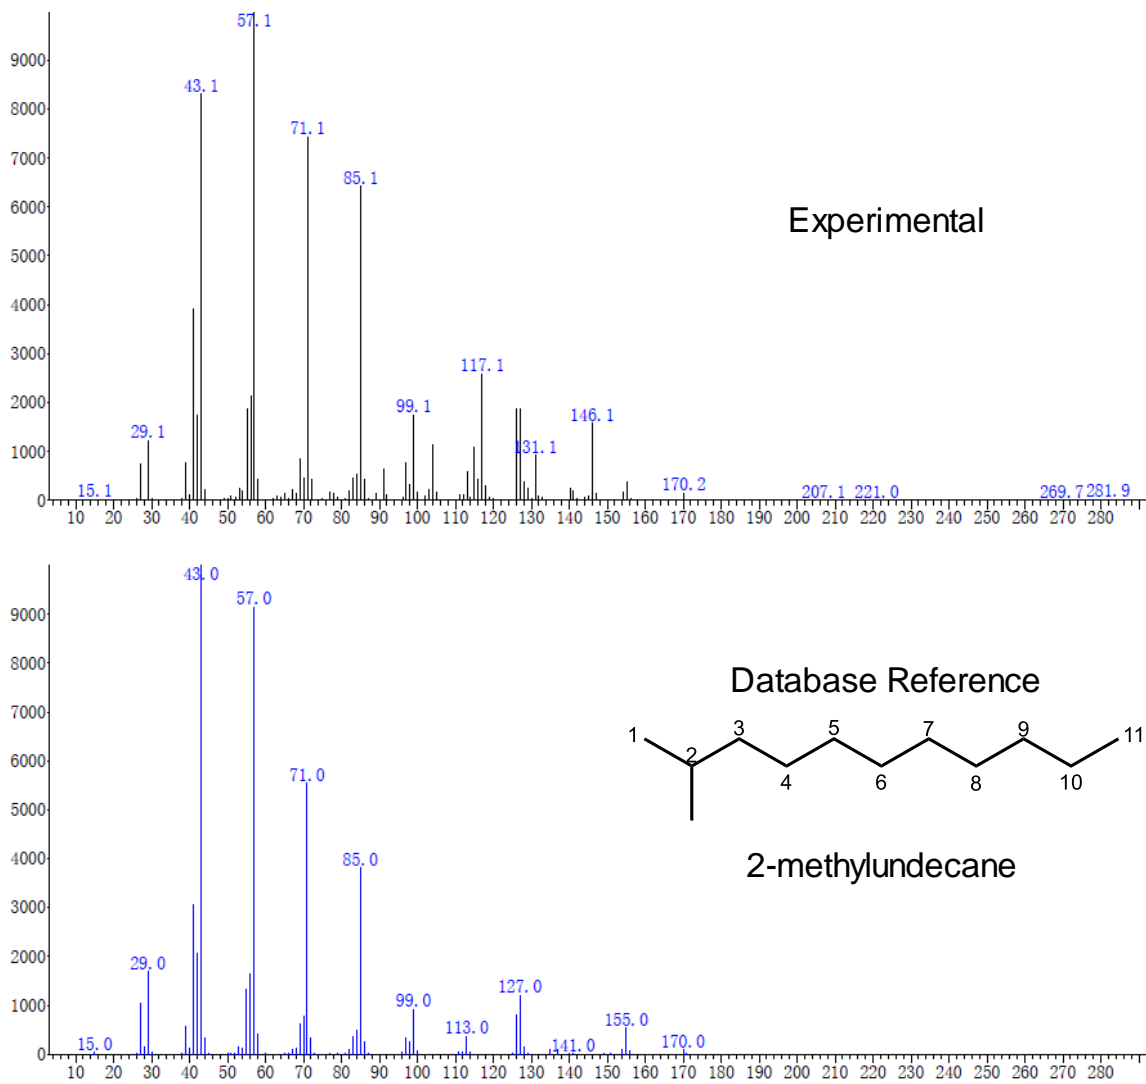

**Fig. S10. GC-MS analysis.** Mass spectrometry data for 2-methylundecane.

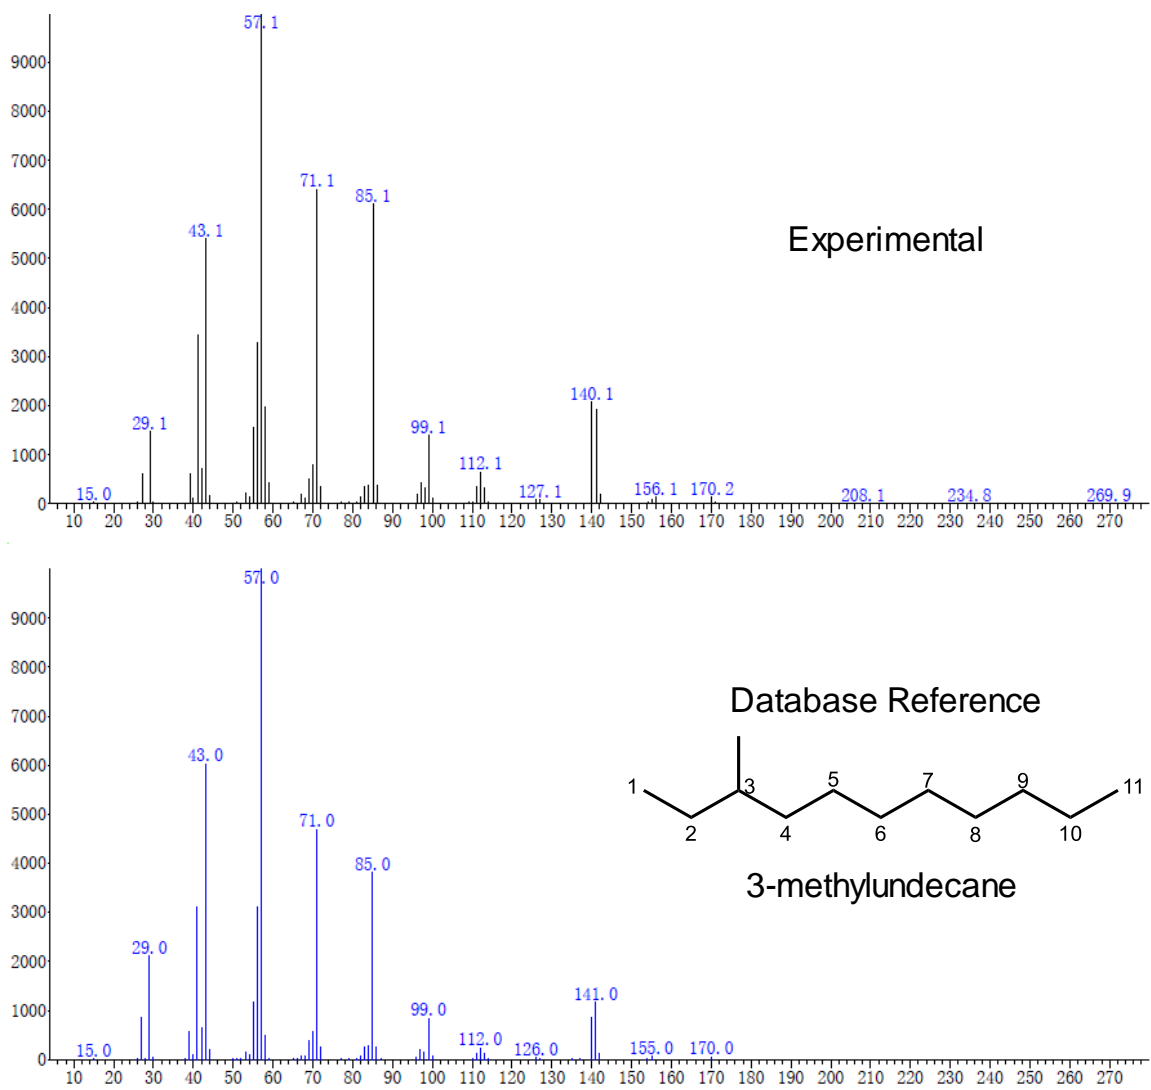

**Fig. S11. GC-MS analysis.** Mass spectrometry data for 3-methylundecane.

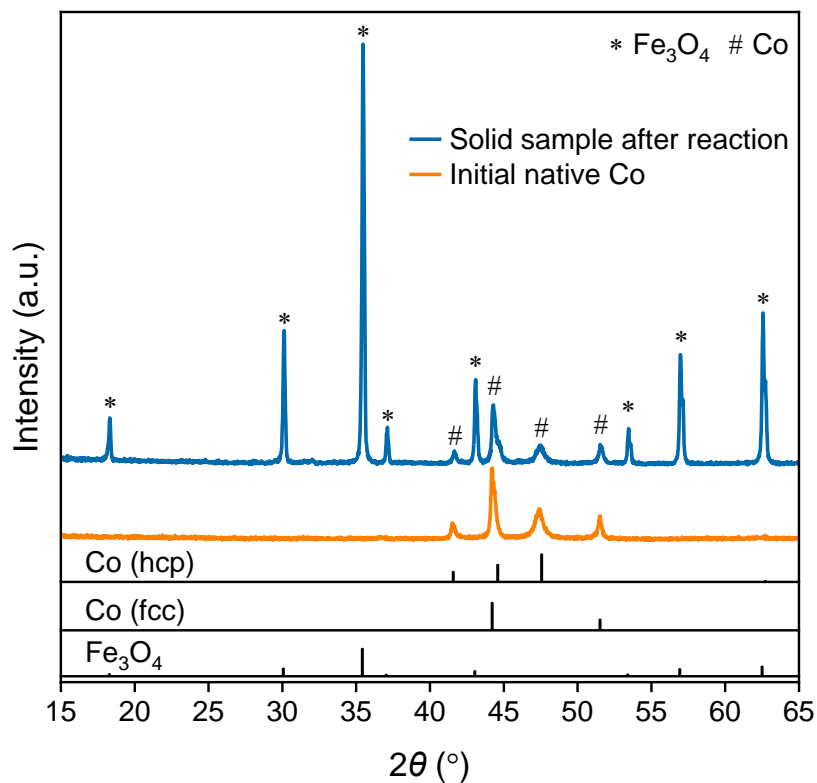

**Fig. S12. XRD analysis.** XRD patterns of the solid sample after hydrothermal reaction (blue line) . The Fe was oxidized into magnetite (Fe<sub>3</sub>O<sub>4</sub>) while Co maintained its initial native valence state (orange line). Experimental conditions: Fe, 80 mmol; NaHCO<sub>3</sub>, 80 mmol; Co, 40 mmol; water filling, 50%; 300 °C, 3 h. The vertical black lines are the XRD peaks of standard Co (JCPDS No. 01-1278 for hcp and No. 15-0806 for fcc) and Fe<sub>3</sub>O<sub>4</sub> (JCPDS No. 79-0418).

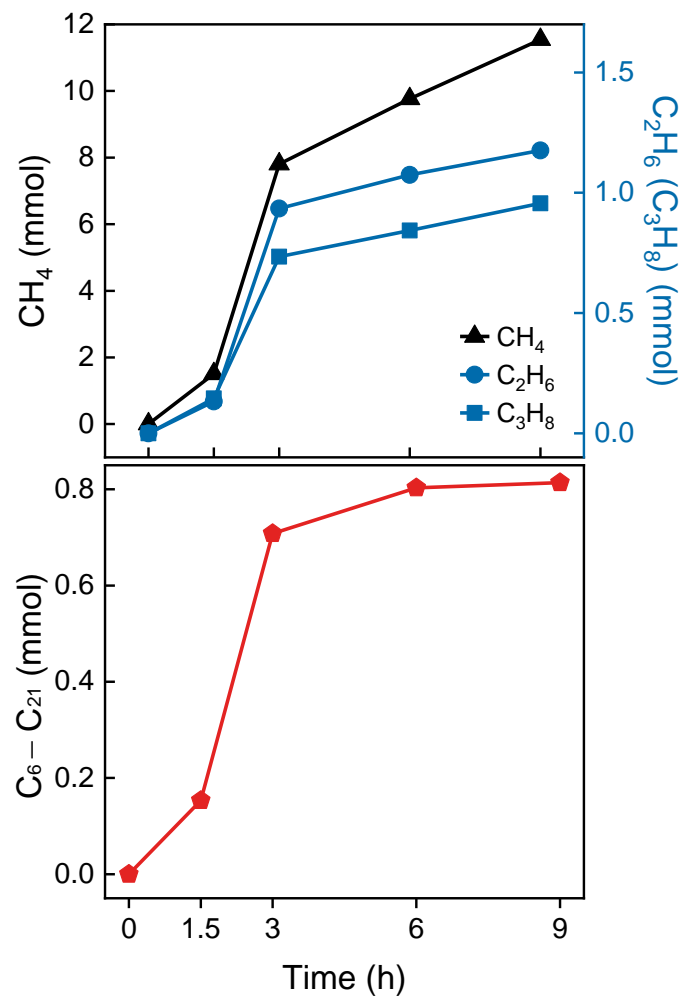

**Fig. S13. Time course of hydrothermal reaction.** Kinetic curves of hydrothermal production of C<sub>1</sub>~C<sub>3</sub> (upper panel) and C<sub>6</sub>~C<sub>21</sub> (bottom panel) alkanes as a function of reaction time. Experimental conditions: Fe, 80 mmol; NaHCO<sub>3</sub>, 80 mmol; Co, 40 mmol; water filling, 50%; 300 °C.



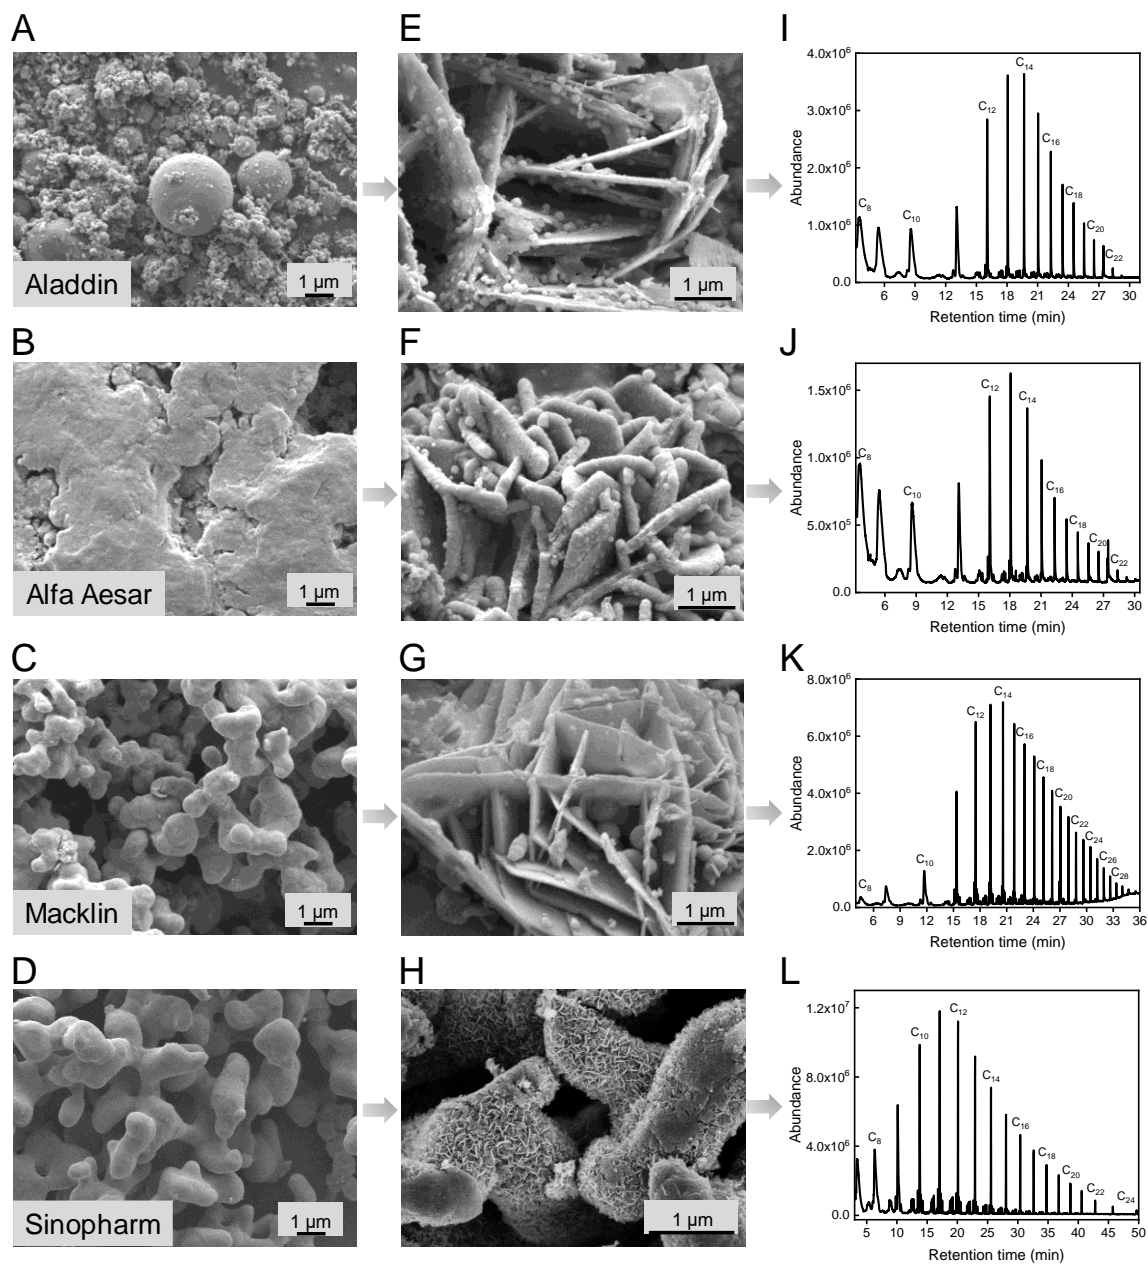

**Fig. S14. Morphology evolution of Co.** SEM images of Co samples obtained from different companies before reaction (A–D), after hydrothermal reaction (E–H), and the total ion chromatogram (I–L) from GC-MS analysis of its catalytic hydrocarbons production. The commercial Co powder was purchased from Aladdin (A), Alfa Aesar (B), and Macklin (C), and Sinopharm (D) Company, respectively. Experimental conditions: Fe, 80 mmol; NaHCO<sub>3</sub>, 80 mmol; Co, 40 mmol; water filling, 50%; 300 °C, 3 h.

According to the proposed mechanism of the origin of honeycomb Co nanosheets, the formation of honeycomb Co nanosheets should not be limited to the initial morphology of Co. To test this hypothesis, we investigated the formation of long-chain hydrocarbons and honeycomb Co

nanosheets with different commercial Co powders in the reduction of  $\text{NaHCO}_3$ . It was demonstrated that powder Co obtained from different companies could catalyze the formation of hydrocarbons and honeycomb-like nanosheets under the same conditions, further supporting the mechanism of Co stability by the dissolution and reprecipitation process and indicating that the formation of long-chain hydrocarbons is not dependent on the initial Co morphology, which is significant for industrial and environmental applications.

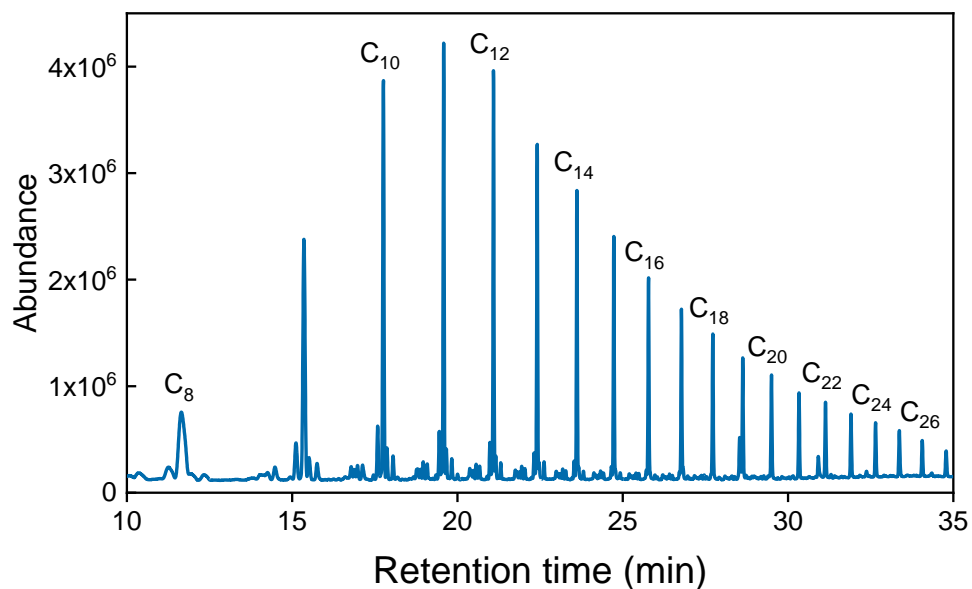

**Fig. S15. Performance of recycled catalyst.** GC-MS analysis of hydrothermal NaHCO<sub>3</sub> reduction with H<sub>2</sub> gas using the recycled Co-Fe<sub>3</sub>O<sub>4</sub> catalyst. We tested the catalytic activity of the recycled Co-Fe<sub>3</sub>O<sub>4</sub> catalyst with an external H<sub>2</sub> reductant. Experimental conditions: H<sub>2</sub>, 5 MPa; NaHCO<sub>3</sub>, 80 mmol; water filling, 50%; 300 °C, 3 h. The formation of long-chain hydrocarbons was clearly observed, indicating the high catalytic activity of the formed Co-Fe<sub>3</sub>O<sub>4</sub> catalyst for synthesizing long-chain hydrocarbons. This result suggests the fundamental role of honeycomb Co nanosheets in prebiotic organic synthesis and introduces a new approach for synthesizing long-chain hydrocarbons by nonnoble metal catalysts in conventional CO<sub>2</sub> hydrogenation.

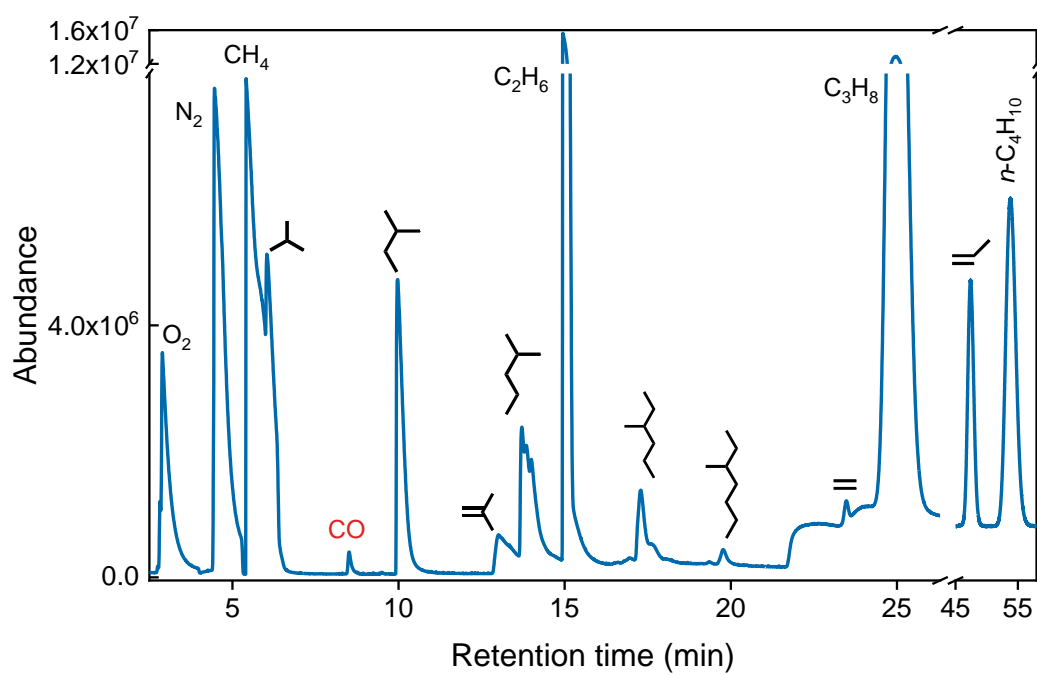

**Fig. S16. GC-MS analysis.** Total ion chromatogram from GC-MS analysis of the gas products. The GC-MS analysis showed that CO was formed. Experimental conditions: Fe, 80 mmol;  $\text{NaHCO}_3$ , 80 mmol; Co, 40 mmol; water filling, 50%; 300 °C, 3 h.

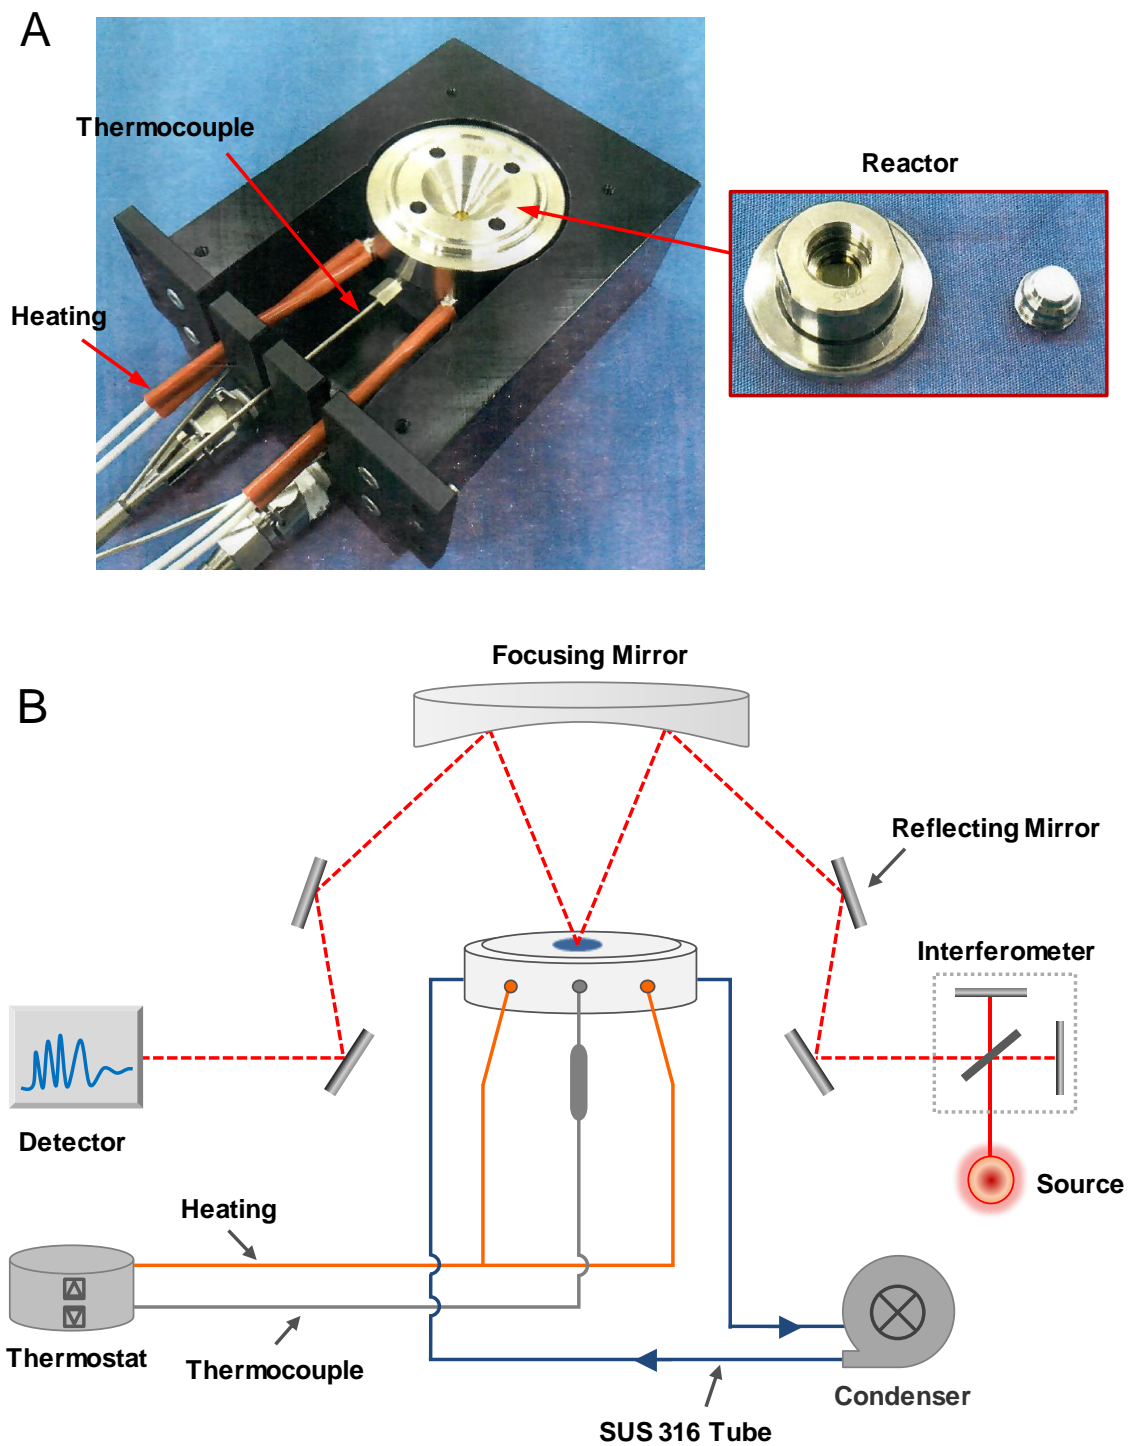

**Fig. S17. Schematic of operando high-pressure and high-temperature ATR-FTIR cell. (A)** Photo of high-pressure and high-temperature reactor. **(B)** Schematic of the whole operando ATR-FTIR system.

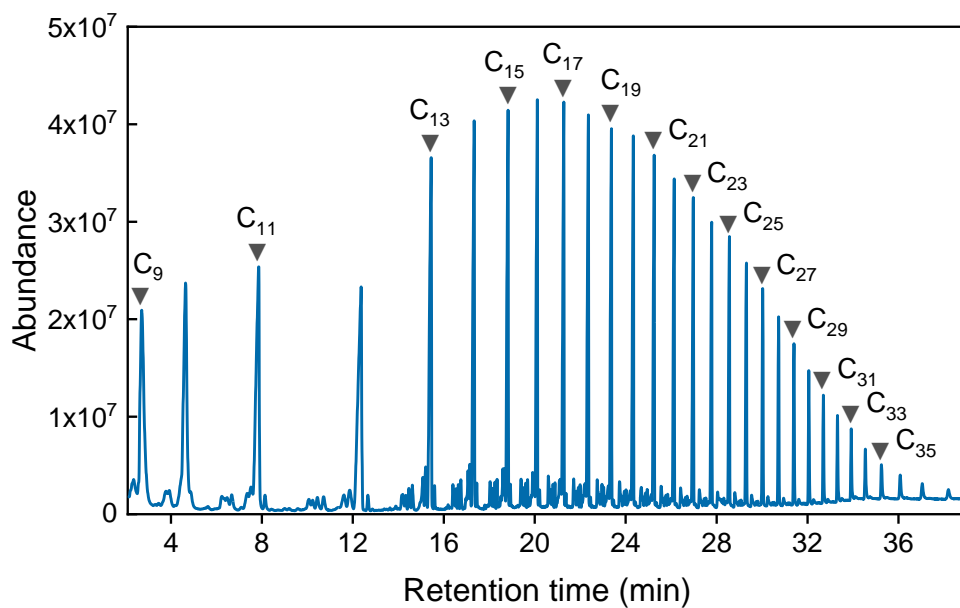

**Fig. S18. GC-MS analysis.** Total ion chromatogram from GC-MS analysis of hydrothermal CO reduction. The experiment with CO as the initial carbon source for substituting  $\text{NaHCO}_3$  under the same conditions also generated long-chain hydrocarbons. Experimental conditions: Fe, 80 mmol; CO, 5 MPa; Co, 40 mmol; water filling, 50%; 300 °C, 3 h, pH 8.

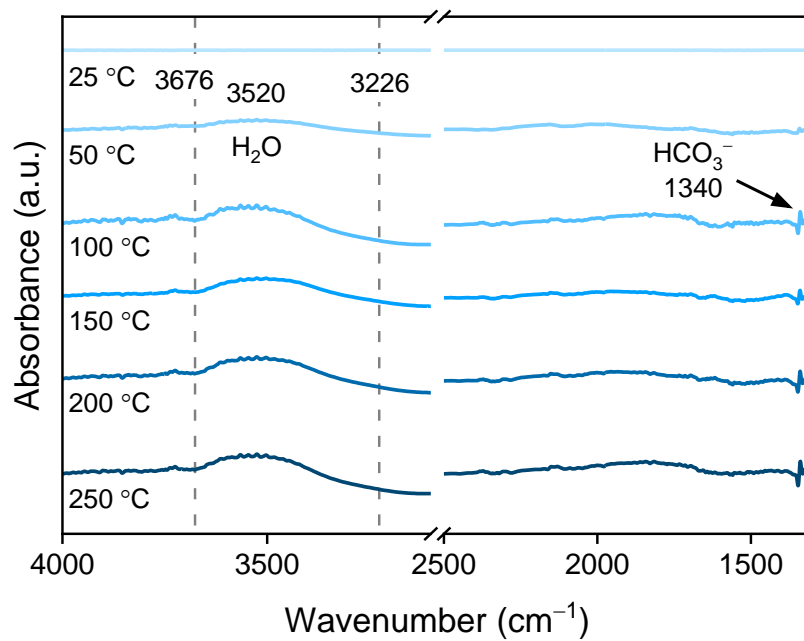

**Fig. S19. ATR-FTIR spectra.** Operando ATR-FTIR spectra of NaHCO<sub>3</sub> reduction by Fe in the absence of Co. The peak from the hydroxyl group in Fe-OH located at 3676 and 3226 cm<sup>-1</sup> disappeared in the absence of Co.

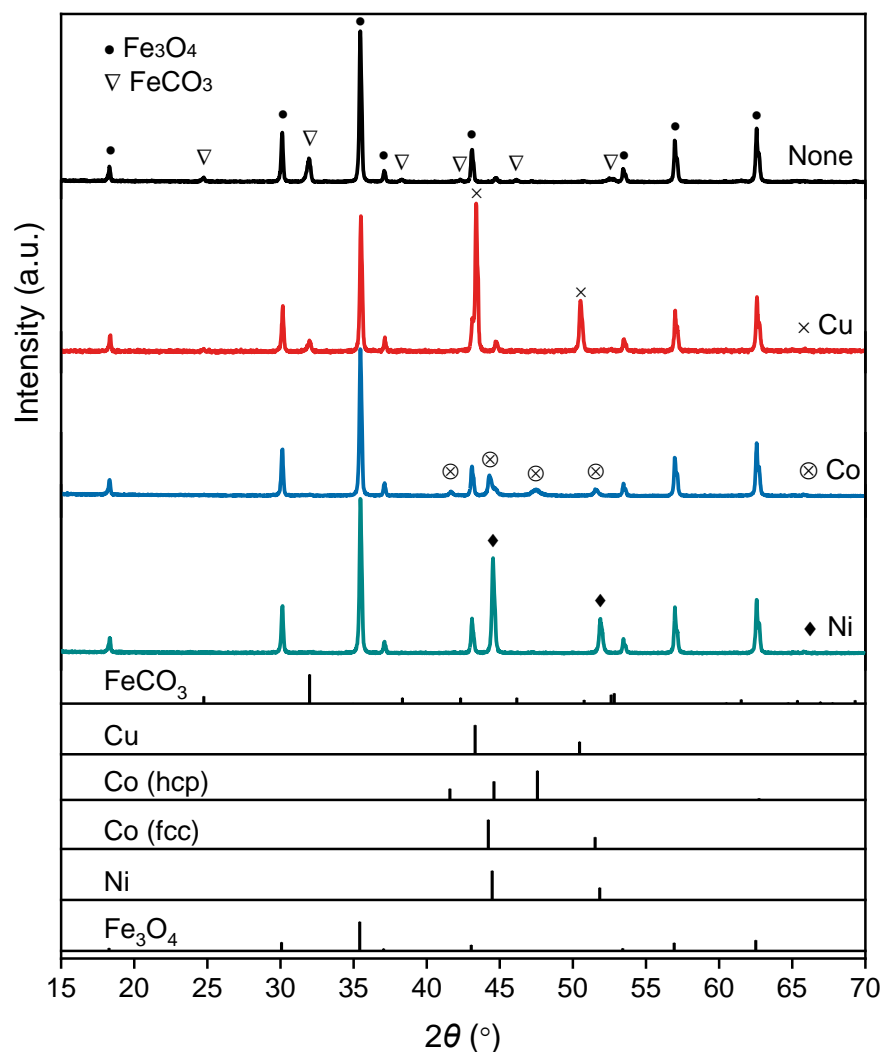

**Fig. S20. XRD analysis.** XRD patterns of the solid samples after hydrothermal reactions with different transition metals. The formation of FeCO<sub>3</sub> was inhibited by increasing the adsorption energy of COOH on the metal surface. Experimental conditions: Fe, 80 mmol; NaHCO<sub>3</sub>, 80 mmol; Cu/Co/Ni, 40 mmol; water filling, 50%; 300 °C, 3 h. The vertical black lines are the XRD peaks of standard FeCO<sub>3</sub> (JCPDS No. 29-0696), Cu (JCPDS No. 85-1326), Co (JCPDS No. 01-1278 for hcp and No. 15-0806 for fcc), Ni (JCPDS No. 70-1849), and Fe<sub>3</sub>O<sub>4</sub> (JCPDS No. 79-0418).



## SI References

1. Martin, W., Baross, J., Kelley, D. & Russell, M.J. Hydrothermal vents and the origin of life. *Nat. Rev. Microbiol.* **6**, 805-814 (2008).
2. Horita, J. & Berndt, M.E. Abiogenic methane formation and isotopic fractionation under hydrothermal conditions. *Science* **285**, 1055-1057 (1999).
3. Sverjensky, D.A., Stagno, V. & Huang, F. Important role for organic carbon in subduction-zone fluids in the deep carbon cycle. *Nat. Geosci.* **7**, 909-913 (2014).
4. McCollom, T.M., Lollar, B.S., Lacrampe-Couloume, G. & Seewald, J.S. The influence of carbon source on abiotic organic synthesis and carbon isotope fractionation under hydrothermal conditions. *Geochim. Cosmochim. Acta* **74**, 2717-2740 (2010).
5. McCollom, T.M. Abiotic methane formation during experimental serpentinization of olivine. *Proc. Natl. Acad. Sci. U.S.A.* **113**, 13965-13970 (2016).
6. McCollom, T.M. Laboratory Simulations of Abiotic Hydrocarbon Formation in Earth's Deep Subsurface. *Rev. Mineral. Geochem.* **75**, 467-494 (2013).
7. Ueda, H. & Shibuya, T. Composition of the Primordial Ocean Just after Its Formation: Constraints from the Reactions between the Primitive Crust and a Strongly Acidic, CO<sub>2</sub>-Rich Fluid at Elevated Temperatures and Pressures. *Minerals* **11**, 389 (2021).
